# Supplementary material for: The Society for Immunotherapy in Cancer statement on best practices for multiplex immunohistochemistry (IHC) and immunofluorescence (IF) staining and validation
Source: PubMed Central journal article supplement — J Immunother Cancer. 2020 May 15;8(1):e000155. doi: 10.1136/jitc-2019-000155 (PMC7239569; doi:10.1136/jitc-2019-000155), 2020-05-15
Supplement: jitc-2019-000155supp001.pdf [file jitc-2019-000155supp001.pdf]

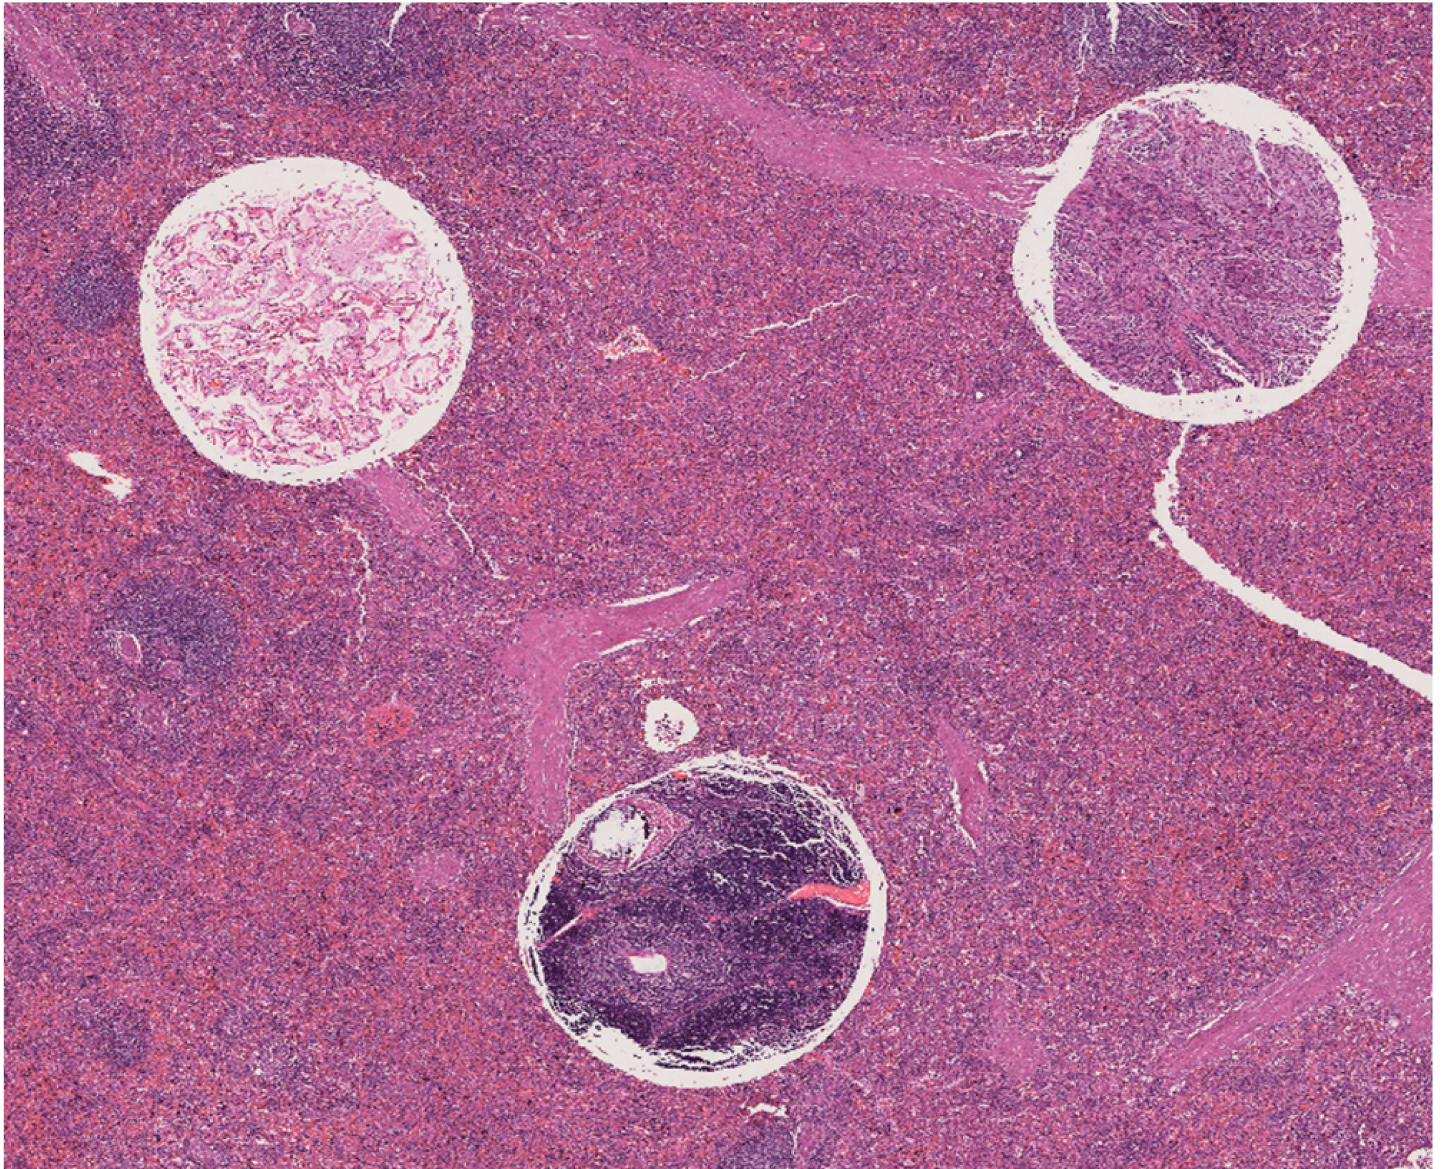

**Supplementary Figure 1.** TMA cores are embedded in a spleen tissue in order to provide a large lymphoid organ base as a positive and negative control for immune cell markers. Spleen or tonsil as a base tissue provides a solid environment for integration of the cores while also providing a large lymphoid organ geography for control immune markers.
