# Supplementary material for: The Society for Immunotherapy in Cancer statement on best practices for multiplex immunohistochemistry (IHC) and immunofluorescence (IF) staining and validation
Source: PubMed Central journal article supplement — J Immunother Cancer. 2020 May 15;8(1):e000155. doi: 10.1136/jitc-2019-000155 (PMC7239569; doi:10.1136/jitc-2019-000155), 2020-05-15
Supplement: jitc-2019-000155supp002.pdf [file jitc-2019-000155supp002.pdf]

Supplementary Table 1. Comparisons of technical performance of MIBI-TOF and IMC.

|                 | <b>Imaging Resolution</b> | <b>Time to acquire 1 mm<sup>2</sup></b> | <b>Dynamic Range</b> | <b>Commercial Availability</b>             |
|-----------------|---------------------------|-----------------------------------------|----------------------|--------------------------------------------|
| <b>MIBI-TOF</b> | 1 μm                      | 15 min                                  | 10 <sup>5</sup>      | Beta Ongoing;<br>Commercial launch Q4 2019 |
|                 | 500 nm                    | 3.8 hr                                  |                      |                                            |
|                 | 260 nm                    | 27 hr                                   |                      |                                            |
| <b>IMC</b>      | 1 μm                      | 2 hr                                    | 10 <sup>4</sup>      | Full                                       |
